# Supplementary material for: Self-surfactant room-temperature synthesis of morphology-controlled K0.3Bi0.7F2.4 nanoscintillators
Source: Royal Society of Chemistry journal article supplement (doi:10.1039/d2tc03079a), 2022-01-01
Supplement: d2tc03079a1.pdf [file d2tc03079a1.pdf]

## Supporting Information

### **Self-surfactant room-temperature synthesis of morphology-controlled $K_{0.3}Bi_{0.7}F_{2.4}$ nanoscintillators**

Dongxun Chen,<sup>a</sup> Yanjie Liang,<sup>\*a</sup> Shihai Miao,<sup>a</sup> Xihui Shan,<sup>a</sup> Xiaojia Wang,<sup>b</sup> Weili Wang,<sup>a</sup> Yuhai Zhang,<sup>b</sup>  
Jianqiang Bi<sup>a</sup> and Dongqi Tang<sup>\*c</sup>

---

<sup>a</sup>Key Laboratory for Liquid-Solid Structure Evolution and Processing of Materials, Ministry of Education, Shandong University, Jinan 250061, P. R. China. E-mail: [yanjie.liang@sdu.edu.cn](mailto:yanjie.liang@sdu.edu.cn).

<sup>b</sup>Collaborative Innovation Center of Technology and Equipment for Biological Diagnosis and Therapy in Universities of Shandong Institute for Advanced Interdisciplinary Research (iAIR), University of Jinan, Jinan 250022, P. R. China.

<sup>c</sup>Center for Gene & Immunotherapy, the Second Hospital of Shandong University, Jinan 250033, P. R. China. E-mail: [tangdq@sdu.edu.cn](mailto:tangdq@sdu.edu.cn).

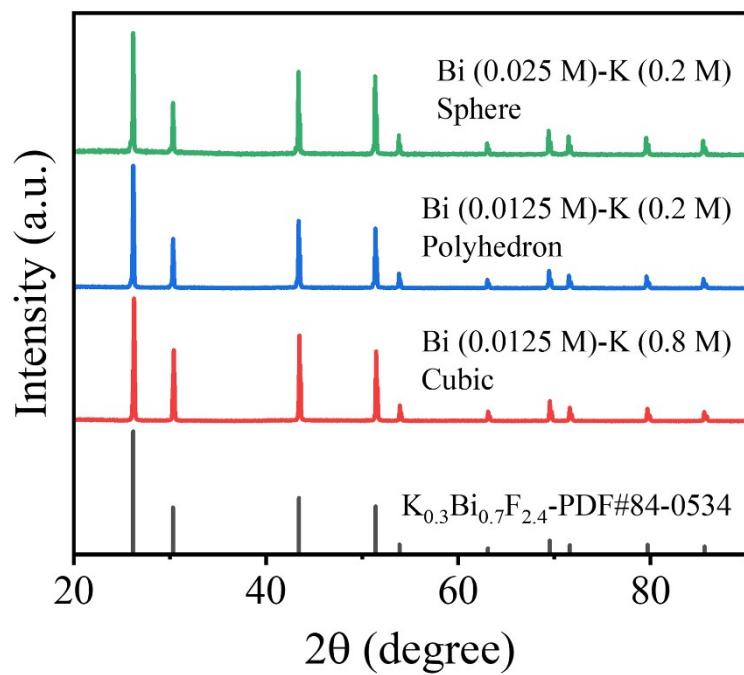

**Fig. S1** XRD patterns of the KBF samples at different concentrations of Bi and F sources.

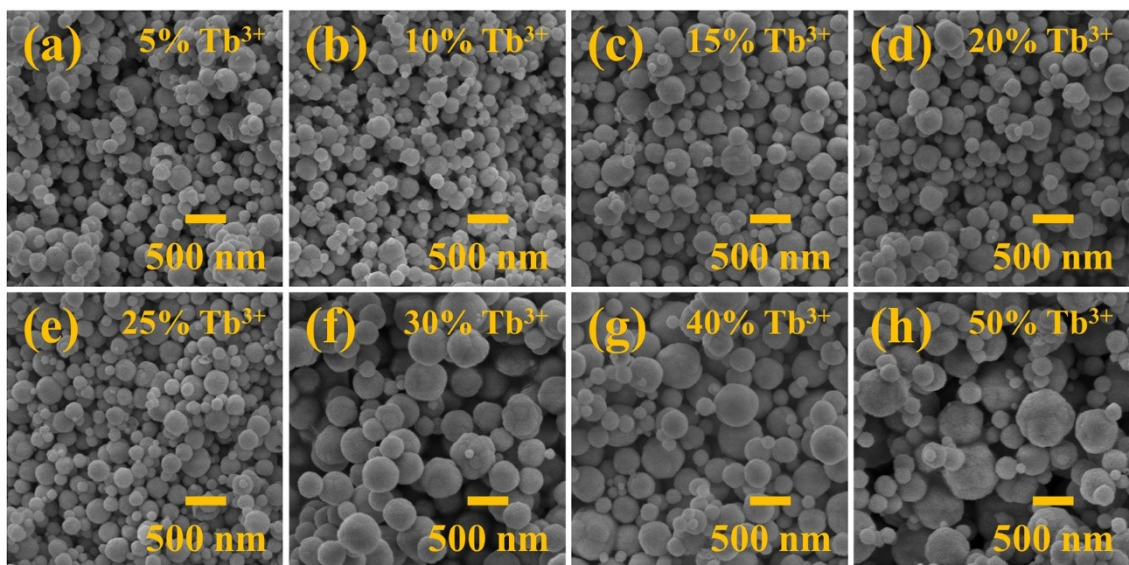

**Fig. S2** SEM images of the KBF:x%Tb samples with different doping concentrations of  $Tb^{3+}$  ions (x = 5, 10, 15, 20, 25, 30, 40, 50).

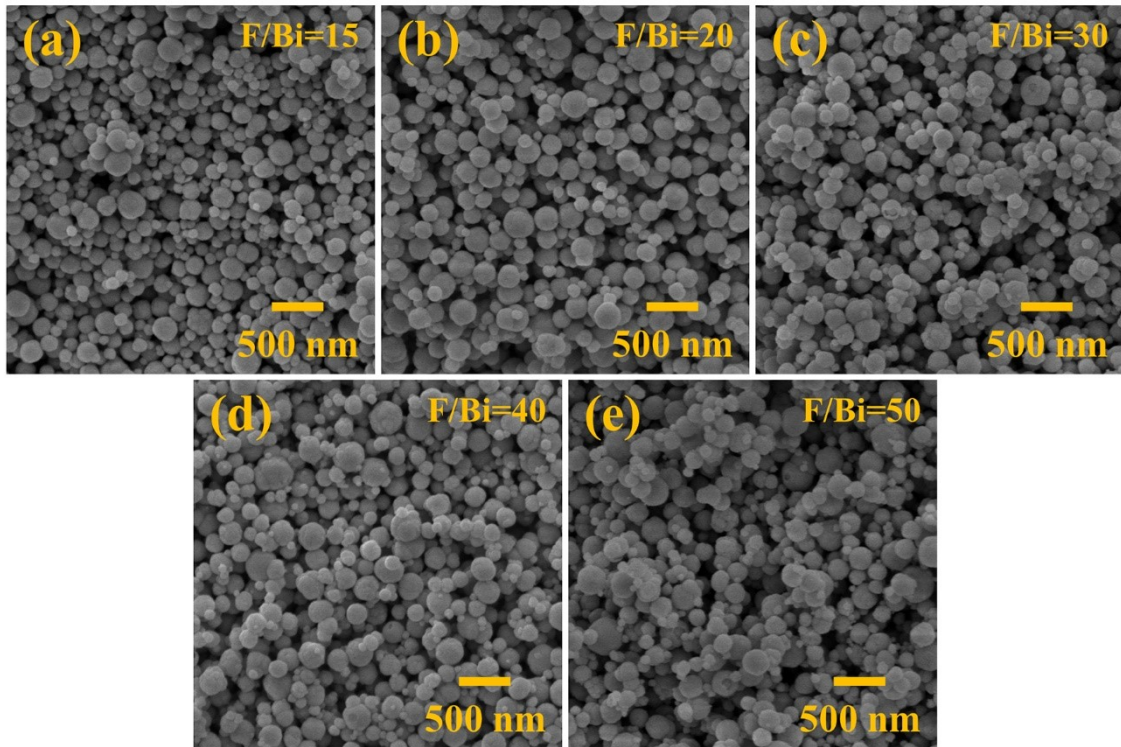

**Fig. S3** SEM images of the KBF:10%Tb samples at different mole ratios of Bi and F source (F/Bi = 15, 20, 30, 40, 50).

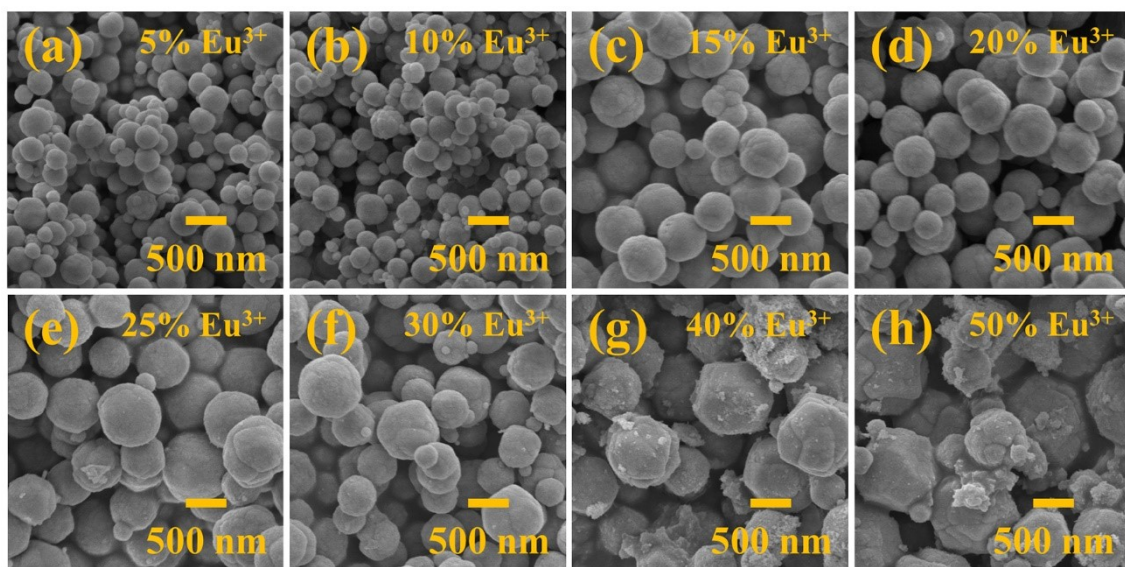

**Fig. S4** SEM images of the KBF:x%Eu samples with different doping concentrations of Eu<sup>3+</sup> ions (x = 5, 10, 15, 20, 25, 30, 40, 50).

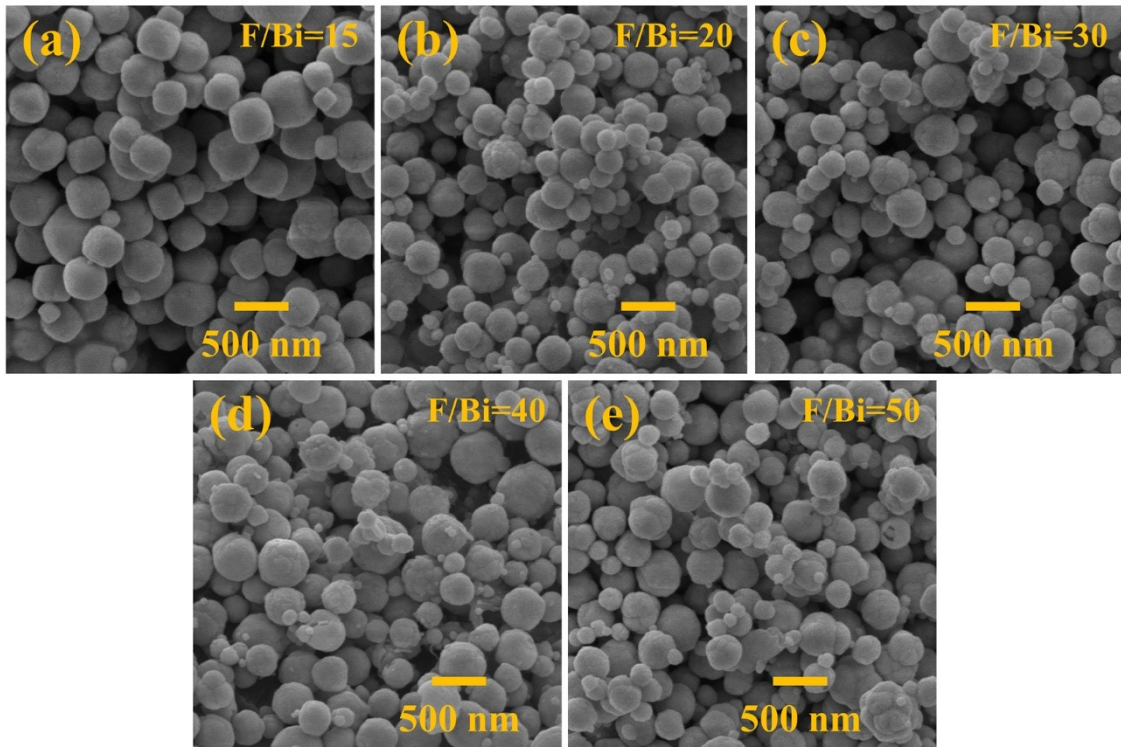

**Fig. S5** SEM images of the KBF:10%Eu samples at different mole ratios of Bi and F source (F/Bi = 15, 20, 30, 40, 50).

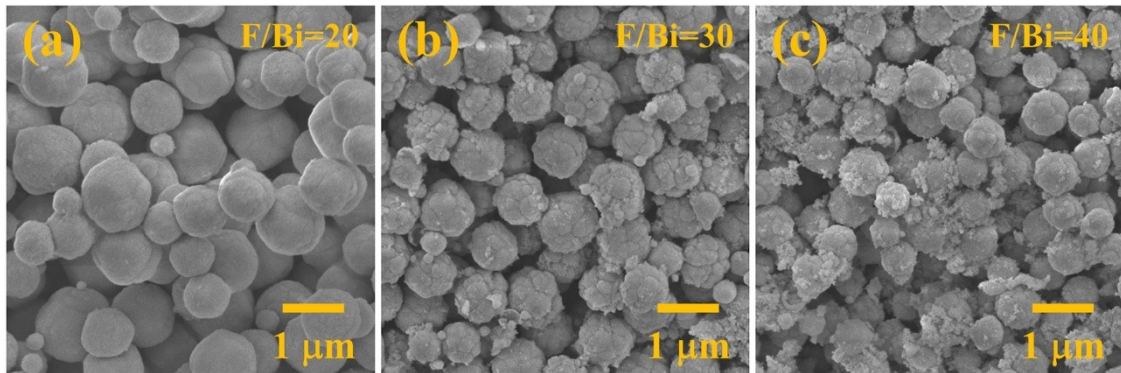

**Fig. S6** SEM images of the KBF:30%Eu samples at different mole ratios of Bi and F source (F/Bi = 20, 30, 40).

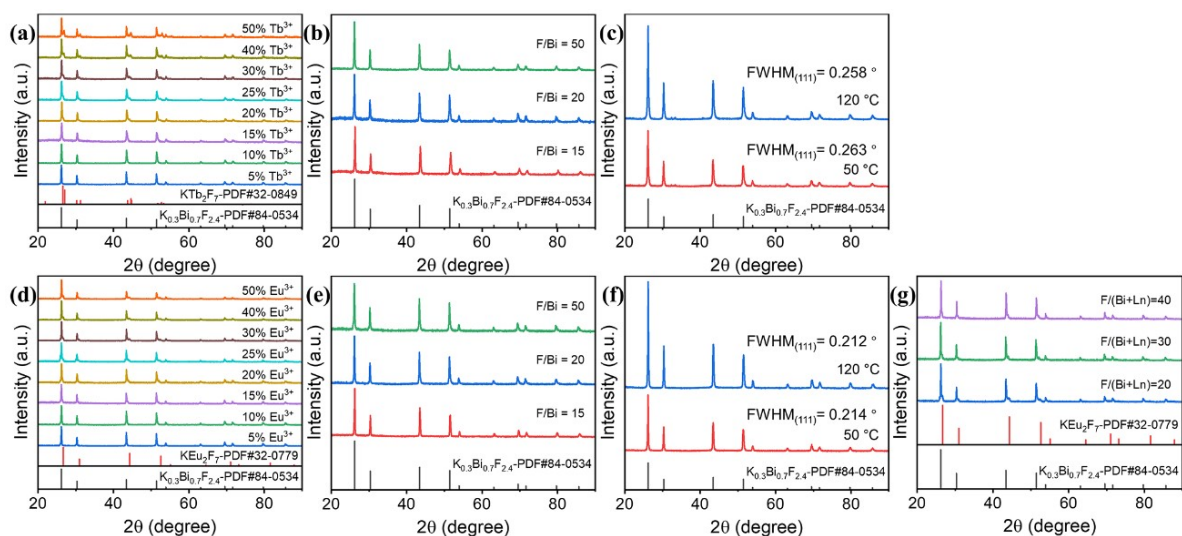

**Fig. S7** XRD patterns of a) KBF:x%Tb and d) KBF:x%Eu samples with different doping concentrations of  $Tb^{3+}$  and  $Eu^{3+}$  ions, respectively. XRD patterns of the b) KBF:10%Tb, e) KBF:10%Eu and g) KBF:30%Eu samples synthesized with different mole ratios of Bi and F source. XRD patterns of c) KBF:10%Tb and f) KBF:10%Eu samples treated at different drying temperatures (50 and 120 °C).



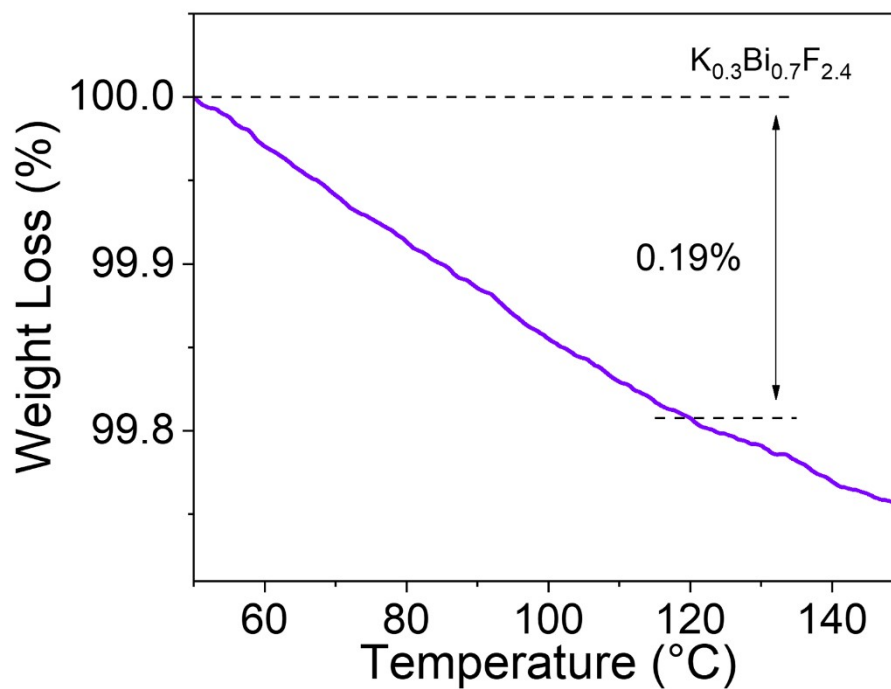

**Fig. S8** TGA curve of the KBF sample from 50 to 150 °C with a heating rate of 10 °C min<sup>-1</sup>.

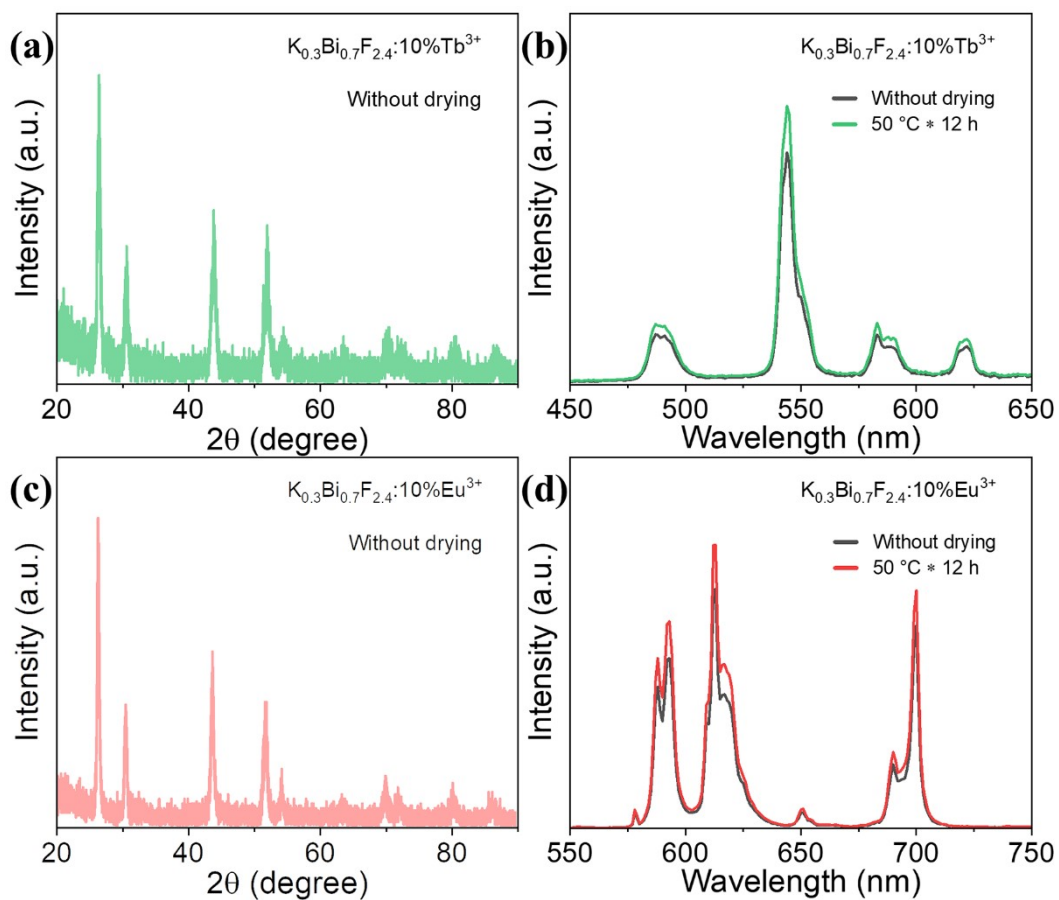

**Fig. S9** (a,c) XRD patterns of the KBF:10%Tb and KBF:10%Eu samples without drying. (b,d) The photoluminescence emission spectra of the KBF:10%Tb and KBF:10%Eu samples before and after drying at 50 °C.

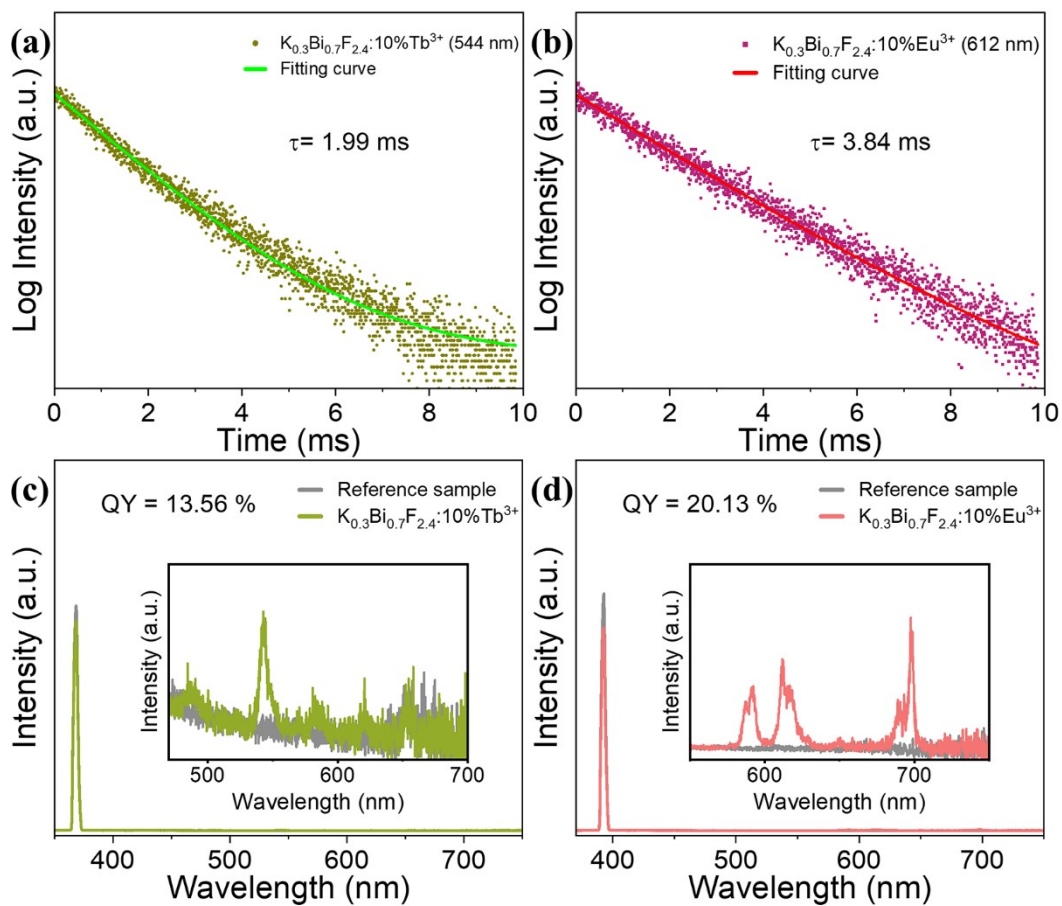

**Fig. S10** (a,b) Luminescence decay curves of the KBF:10%Tb and KBF:10%Eu samples. Excitation line of  $\text{BaSO}_4$  and emission spectrum of KBF:10%Tb (c) and KBF:10%Eu (d) samples. Insets show the magnification of the emission spectra.

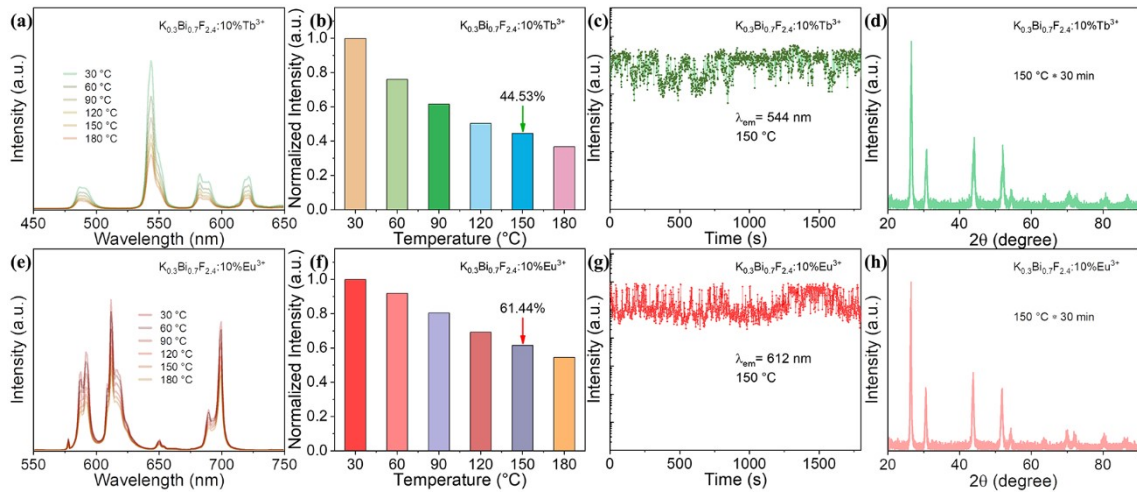

**Fig. S11** Temperature-dependent emission spectra of the KBF:10%Tb (a) and KBF:10%Eu (e) samples. Dependence of emission intensity on the temperature of the KBF:10%Tb (b) and KBF:10%Eu (f) samples. The variation of emission intensities of the KBF:10%Tb (c) and KBF:10%Eu (g) samples under continuous heating at 150 °C for 30 min. XRD patterns of KBF:10%Tb (d) and KBF:10%Eu (h) samples after continuous heating at 150 °C for 30 min.

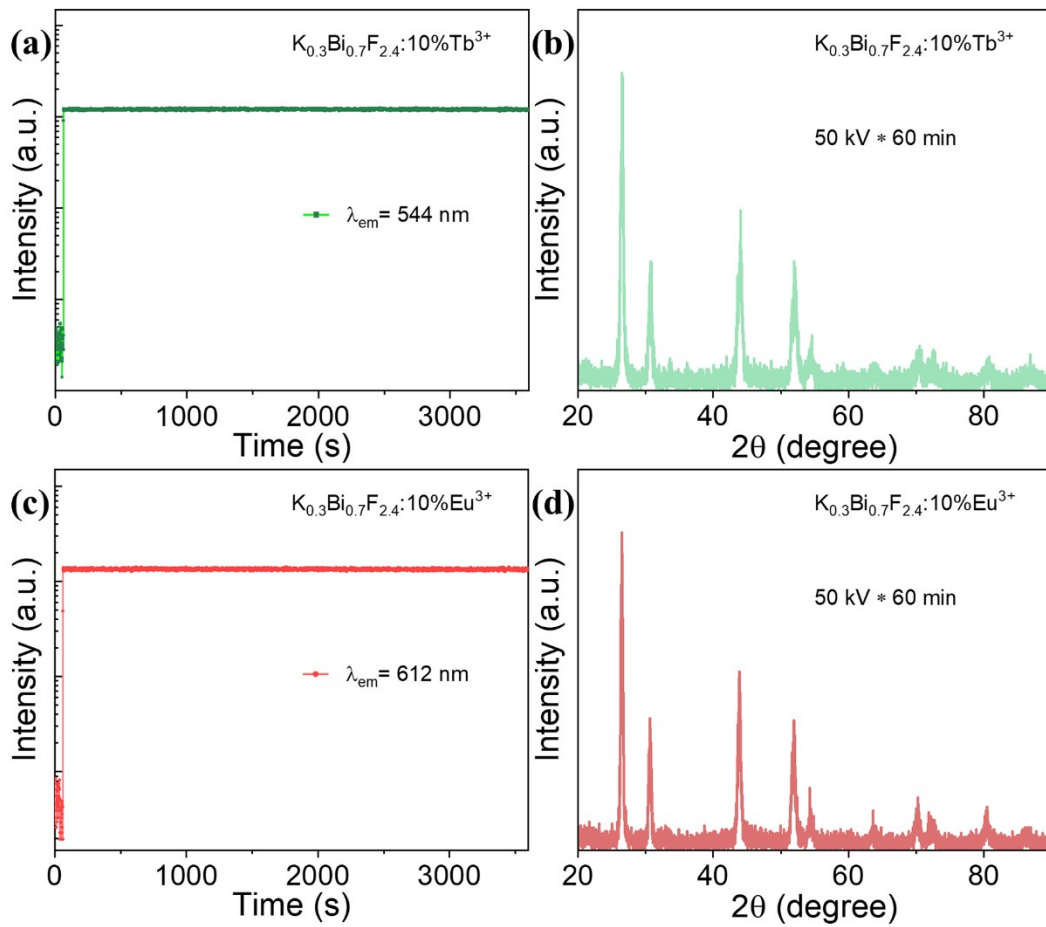

**Fig. S12** (a,c) Radioluminescence stability of a) KBF:10%Tb and c) KBF:10%Eu powder samples under continuous X-ray irradiation with a voltage of 50 kV for 60 min. (b,d) XRD patterns of the KBF:10%Tb and KBF:10%Eu samples after continuous X-ray irradiation with a voltage of 50 kV for 60 min.

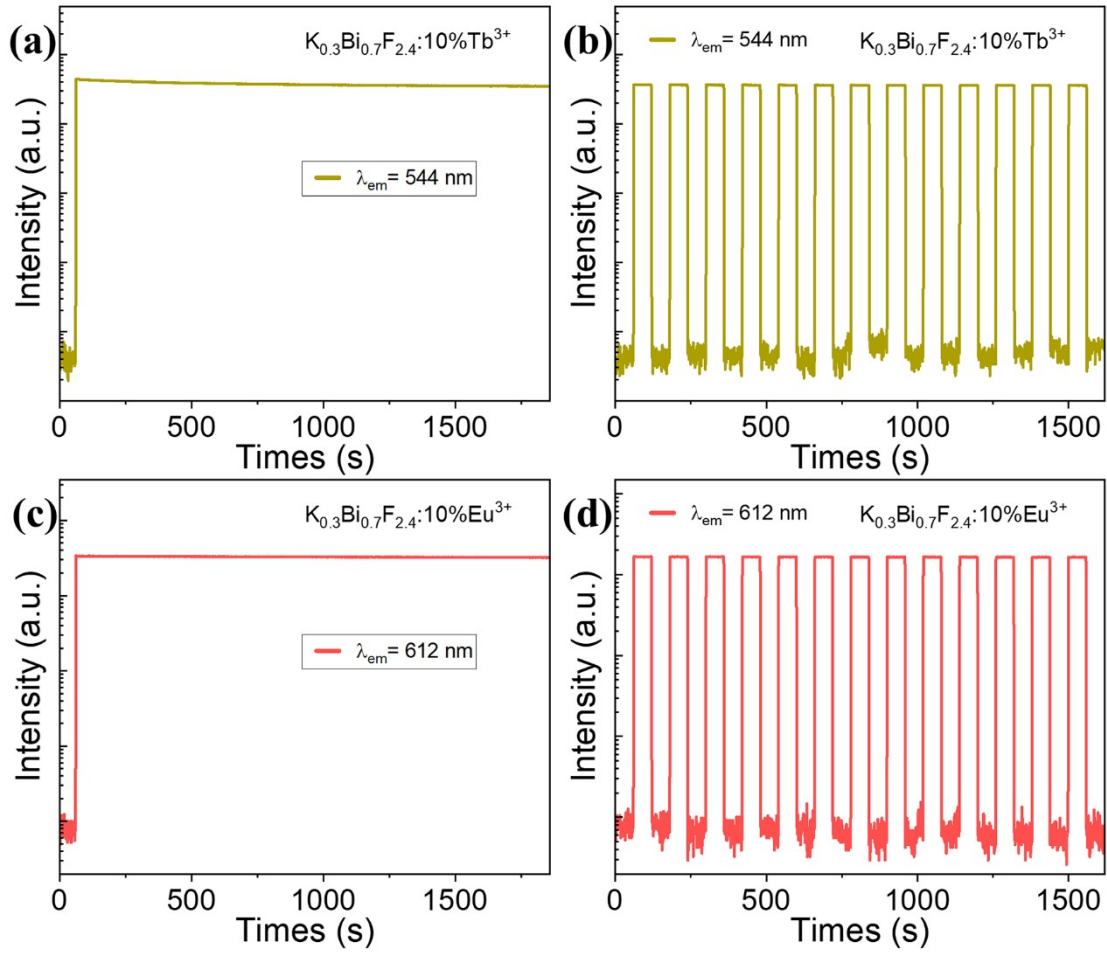

**Fig. S13.** Radioluminescence stability of a) KBF:10%Tb and c) KBF:10%Eu scintillator films under continuous X-ray irradiation with a voltage of 50 kV for 30 min. Radioluminescence stability of b) KBF:10%Tb and d) KBF:10%Eu scintillator films under repeated cycles of X-ray excitation with a time interval of 60 s.

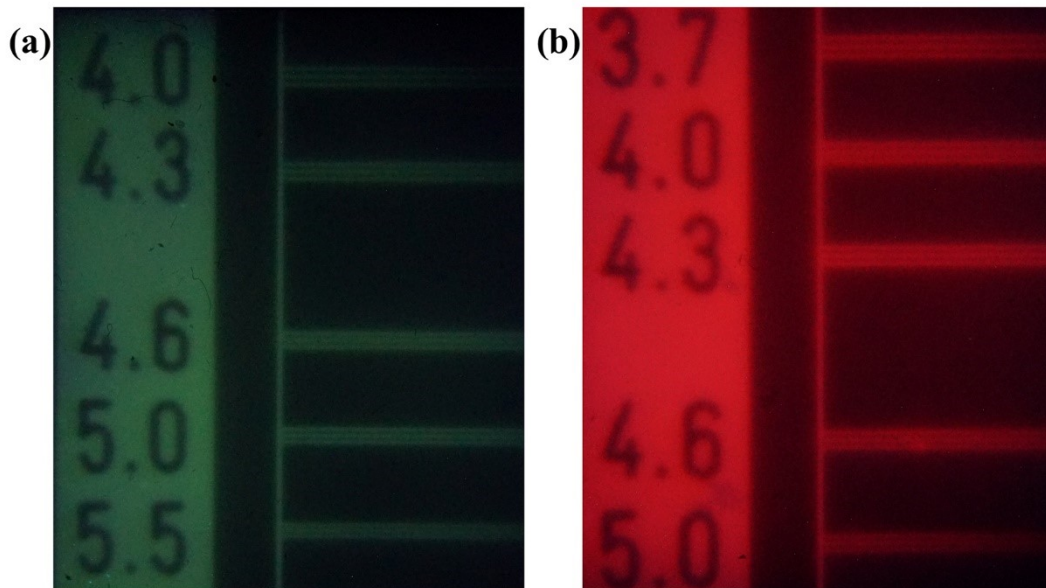

**Fig. S14** Spatial resolution measurements of the KBF:10%Tb (a) and KBF:10%Eu (b) scintillator films.

**Tab. S1** Calculated lattice parameters for the standard KBF host lattice, KBF:Eu and KBF:Tb nanocrystalline particles.

| Parameters                | Compounds                                                            |                                                                       |                                                                       |
|---------------------------|----------------------------------------------------------------------|-----------------------------------------------------------------------|-----------------------------------------------------------------------|
|                           | $\text{K}_{0.3}\text{Bi}_{0.7}\text{F}_{2.4}$<br>(JCPDS No. 84-0534) | $\text{K}_{0.3}\text{Bi}_{0.7}\text{F}_{2.4}:$<br>10%Tb <sup>3+</sup> | $\text{K}_{0.3}\text{Bi}_{0.7}\text{F}_{2.4}:$<br>10%Eu <sup>3+</sup> |
| $a=b=c$                   | 5.8895 Å                                                             | 5.88985 Å                                                             | 5.88947 Å                                                             |
| $V$                       | 204.28 Å <sup>3</sup>                                                | 204.32 Å <sup>3</sup>                                                 | 204.28 Å <sup>3</sup>                                                 |
| $\alpha = \beta = \gamma$ | 90°                                                                  | 90°                                                                   | 90°                                                                   |
| $Z$                       | 4                                                                    | 4                                                                     | 4                                                                     |
| $R_p$                     | —                                                                    | 6.87%                                                                 | 4.91%                                                                 |
| $R_{wp}$                  | —                                                                    | 9.15%                                                                 | 6.51%                                                                 |
| $\chi^2$                  | —                                                                    | 6.30                                                                  | 2.99                                                                  |
